# Supplementary material for: Protein absorption in the zebrafish gut is regulated by interactions between lysosome rich enterocytes and the microbiome
Source: eLife. 2025 Mar 13;13:RP100611. doi: 10.7554/eLife.100611 (PMC11906160; doi:10.7554/eLife.100611)
Supplement: Supplementary file 7. [file elife-100611-supp7.xlsx]

## Sheet: amn_B3_probes
Well Position	Name	Sequence
A1	amn_B3_1-1	TCCATGCCTTTAATTTATTTATGAATTCCACTCAACTTTAACCCG
A2	amn_B3_1-2	GTCCCTGCCTCTATATCTTTGAAACATGATTATGTGGTATATAAT
A3	amn_B3_2-1	GAGACTTTAACAACCTAATAAAACATTCCACTCAACTTTAACCCG
A4	amn_B3_2-2	GTCCCTGCCTCTATATCTTTACTTCACAAGGACATTAAGATTTAA
A5	amn_B3_3-1	GAAACTACACCTTTCATCCATTAAATTCCACTCAACTTTAACCCG
A6	amn_B3_3-2	GTCCCTGCCTCTATATCTTTCGGTTTCATCATAAACAGGATTCAC
A7	amn_B3_4-1	GTCTCTGACCCATACAGCTCAGGTTTTCCACTCAACTTTAACCCG
A8	amn_B3_4-2	GTCCCTGCCTCTATATCTTTTCCGGCATCATAGTGGGCTTGTCAA
A9	amn_B3_5-1	TTCCCCAATGTCACTACCGTTCCTCTTCCACTCAACTTTAACCCG
A10	amn_B3_5-2	GTCCCTGCCTCTATATCTTTTTTGCTTAGTGAGGGGATGCTAGGC
A11	amn_B3_6-1	TAAAGCCTGCAAGTAAACCCAAAATTTCCACTCAACTTTAACCCG
A12	amn_B3_6-2	GTCCCTGCCTCTATATCTTTCCAGGCAGCCCAACACCGCACCGGC
B1	amn_B3_7-1	GCCCCAGATGACGCCTGGAACTCTGTTCCACTCAACTTTAACCCG
B2	amn_B3_7-2	GTCCCTGCCTCTATATCTTTCTGCTGATGCCAACGTTTGAGCCGT
B3	amn_B3_8-1	AGCCAGATTCCCAGATTCCAGTCCGTTCCACTCAACTTTAACCCG
B4	amn_B3_8-2	GTCCCTGCCTCTATATCTTTTTTCTGGTCCAGCAGCAGCACCTGA
B5	amn_B3_9-1	TCTGCTCTCTGGACACTTTCGACATTTCCACTCAACTTTAACCCG
B6	amn_B3_9-2	GTCCCTGCCTCTATATCTTTCCATCTGTACAGATCTGTATTTGTC
B7	amn_B3_10-1	TCAAAGTTGAAGCTCGAAGAGAACTTTCCACTCAACTTTAACCCG
B8	amn_B3_10-2	GTCCCTGCCTCTATATCTTTACGTAGACAAGAGCGCCACAAACAT
B9	amn_B3_11-1	GAGAGTATCGCATCTCACGTTTGCATTCCACTCAACTTTAACCCG
B10	amn_B3_11-2	GTCCCTGCCTCTATATCTTTGATCTTCTCACGATTCCTAGAGTTA
B11	amn_B3_12-1	TGATGCTAATGGTTGCAGTGCCATGTTCCACTCAACTTTAACCCG
B12	amn_B3_12-2	GTCCCTGCCTCTATATCTTTACTGTAGCTTGCCAGAACTAGATGA
C1	amn_B3_13-1	CCAAGTACAGACACACTCTTCACAGTTCCACTCAACTTTAACCCG
C2	amn_B3_13-2	GTCCCTGCCTCTATATCTTTACGTCATGATCTGATGAAATCTCCA
C3	amn_B3_14-1	CTGGCATGGTACACTCTCCTCGTGATTCCACTCAACTTTAACCCG
C4	amn_B3_14-2	GTCCCTGCCTCTATATCTTTTGAAAACTGGAATGTACCTCTGTGC
C5	amn_B3_15-1	CGAACCATTTCAGCGATTCAGAGTCTTCCACTCAACTTTAACCCG
C6	amn_B3_15-2	GTCCCTGCCTCTATATCTTTTAAATTGAGCCGTCACTCCAGATCC
C7	amn_B3_16-1	CCAGACGCCAAAATCAGTTCTCCATTTCCACTCAACTTTAACCCG
C8	amn_B3_16-2	GTCCCTGCCTCTATATCTTTACAGGCAAGCTCATCCCGGTAATAG
C9	amn_B3_17-1	TAAAAACTCCACTTGGTCATTCCCGTTCCACTCAACTTTAACCCG
C10	amn_B3_17-2	GTCCCTGCCTCTATATCTTTGGGTACAGACCCTTTGTCCCAGTTG
C11	amn_B3_18-1	AGAGTGCATTGGCAAAGGGTGAAATTTCCACTCAACTTTAACCCG
C12	amn_B3_18-2	GTCCCTGCCTCTATATCTTTAAAAGAAAAGCAGAACGTTGTGTCC
D1	amn_B3_19-1	CGACCTTTGGTCTGCCGCTGACTGTTTCCACTCAACTTTAACCCG
D2	amn_B3_19-2	GTCCCTGCCTCTATATCTTTCATGAGCGCTCATGATTTAACTTGG
D3	amn_B3_20-1	ATCCGATTGACCAAAAAGCATCTTATTCCACTCAACTTTAACCCG
D4	amn_B3_20-2	GTCCCTGCCTCTATATCTTTACCCGTTATAAACATGACATCAGTC

## Sheet: ctsh_B3_probes
Well Position	Name	Sequence
A1	ctsh_B3_1-1	TTTTTTTTTTTTTTTTTTTTTTTTTTTCCACTCAACTTTAACCCG
A2	ctsh_B3_1-2	GTCCCTGCCTCTATATCTTTTTTTCCCTGAGAAAATATTTATTTC
A3	ctsh_B3_2-1	GATGCAAACATCAAAAACACAAAATTTCCACTCAACTTTAACCCG
A4	ctsh_B3_2-2	GTCCCTGCCTCTATATCTTTGAATGTTAACAAAGTAAACTCCTTC
A5	ctsh_B3_3-1	GGAGGCTAATCGAGTGTGCGTTACTTTCCACTCAACTTTAACCCG
A6	ctsh_B3_3-2	GTCCCTGCCTCTATATCTTTATGTTTTAAATCAATGCACATATAA
A7	ctsh_B3_4-1	TTATCTGATTTCATGAAAACTAGTATTCCACTCAACTTTAACCCG
A8	ctsh_B3_4-2	GTCCCTGCCTCTATATCTTTGACTATAATGGCTCATCACTGACAC
A9	ctsh_B3_5-1	GATTTTGTGTGAGAGTAGAAATATGTTCCACTCAACTTTAACCCG
A10	ctsh_B3_5-2	GTCCCTGCCTCTATATCTTTAAAACAAAAAGTCTCCCTTTTCATG
A11	ctsh_B3_6-1	CACCAAAGGTATAGGATAGGATGAATTCCACTCAACTTTAACCCG
A12	ctsh_B3_6-2	GTCCCTGCCTCTATATCTTTCGCAGCAAGTCCACACATGTTCTTT
B1	ctsh_B3_7-1	AAATATCCTTTAATCCCCCAGTTGGTTCCACTCAACTTTAACCCG
B2	ctsh_B3_7-2	GTCCCTGCCTCTATATCTTTCCCCAGGAGTTCTTCACGATCCAGT
B3	ctsh_B3_8-1	CCTCAGCATAACCCACAGCGAGCACTTCCACTCAACTTTAACCCG
B4	ctsh_B3_8-2	GTCCCTGCCTCTATATCTTTCATGGTTTACCATGTCAGTAGTGTT
B5	ctsh_B3_9-1	GGTATAAATTCCATCCTTGTAGTGCTTCCACTCAACTTTAACCCG
B6	ctsh_B3_9-2	GTCCCTGCCTCTATATCTTTGAAATCAGATGTCACCTCATATGCG
B7	ctsh_B3_10-1	AACCTGGCAACTGCATCCACCATGCTTCCACTCAACTTTAACCCG
B8	ctsh_B3_10-2	GTCCCTGCCTCTATATCTTTATTTCATCATACTTTGTGATGTTTA
B9	ctsh_B3_11-1	AAGCTGCAGCCAATTGTGGTTTGAATTCCACTCAACTTTAACCCG
B10	ctsh_B3_11-2	GTCCCTGCCTCTATATCTTTTACATTGACCCCCTTTAGCCTGGTA
B11	ctsh_B3_12-1	TGTCATAAGACCTTTGTTGTACATGTTCCACTCAACTTTAACCCG
B12	ctsh_B3_12-2	GTCCCTGCCTCTATATCTTTATACTCAAAGGCATGACTCGGGAGT
C1	ctsh_B3_13-1	TGATTGTCGAAATCACCTGCACAATTTCCACTCAACTTTAACCCG
C2	ctsh_B3_13-2	GTCCCTGCCTCTATATCTTTATAAGCTGCTGCTCTGCTAGTTGCA
C3	ctsh_B3_14-1	CGATAGCAGTGACAGACTCCAGACATTCCACTCAACTTTAACCCG
C4	ctsh_B3_14-2	GTCCCTGCCTCTATATCTTTCTGTGGTGGAAAAAGTCCAGCAGCT
C5	ctsh_B3_15-1	ATTCTTGACATCAGTAATGTAGTGTTTCCACTCAACTTTAACCCG
C6	ctsh_B3_15-2	GTCCCTGCCTCTATATCTTTCTTGGTTCTCCAGTCGATAGCATCA
C7	ctsh_B3_16-1	CTGCTCACATGATTCCCTCTAGTGGTTCCACTCAACTTTAACCCG
C8	ctsh_B3_16-2	GTCCCTGCCTCTATATCTTTGAACAGTTCTGGGGTTCCGTCAGGA
C9	ctsh_B3_17-1	ATTCAGCAAAGGTCATGTCTGAAAATTCCACTCAACTTTAACCCG
C10	ctsh_B3_17-2	GTCCCTGCCTCTATATCTTTGGTTCAGTCCCATTGAAAACTTGTG
C11	ctsh_B3_18-1	TTGGTCAATCCTCTTCTTGTTCTCCTTCCACTCAACTTTAACCCG
C12	ctsh_B3_18-2	GTCCCTGCCTCTATATCTTTGAATATCTGGAGCCGCTGGTAAAAT
D1	ctsh_B3_19-1	TTTTTATTGTACTGAGACATCCATGTTCCACTCAACTTTAACCCG
D2	ctsh_B3_19-2	GTCCCTGCCTCTATATCTTTTTGAAATGATACTCATCTTCCTCGG
D3	ctsh_B3_20-1	CAAGTACCTGATAGAGAACCGCGAATTCCACTCAACTTTAACCCG
D4	ctsh_B3_20-2	GTCCCTGCCTCTATATCTTTGGACCGCTAAAATCAGCCTGTTCAT

## Sheet: ctsz_B1_probes
Well Position	Name	Sequence
A1	ctsz_B1_1-1	TTTTTTTTTTTTTTTTTTTAGTTGGTAGAAGAGTCTTCCTTTACG
A2	ctsz_B1_1-2	GAGGAGGGCAGCAAACGGAAAAGACTTTTACTGAAGAGTGTGACA
A3	ctsz_B1_2-1	GCTGTTGATATGGTTTGACAGCAATTAGAAGAGTCTTCCTTTACG
A4	ctsz_B1_2-2	GAGGAGGGCAGCAAACGGAATTTATGGGTATTTTGCTTTAATGTT
A5	ctsz_B1_3-1	TGCTTTAAATACACAATAGCAAACCTAGAAGAGTCTTCCTTTACG
A6	ctsz_B1_3-2	GAGGAGGGCAGCAAACGGAAAAAACTATGACCAGAGATCAGTCCA
A7	ctsz_B1_4-1	TAGATGTCCTACTGGTATATAAAAATAGAAGAGTCTTCCTTTACG
A8	ctsz_B1_4-2	GAGGAGGGCAGCAAACGGAAAGTAACGGGCACTGCTTTTCCCTTT
A9	ctsz_B1_5-1	AAAAAAAATTACAAATACAAATCTGTAGAAGAGTCTTCCTTTACG
A10	ctsz_B1_5-2	GAGGAGGGCAGCAAACGGAACAATTTCAAAGAAAACATTCCTGAG
A11	ctsz_B1_6-1	GCAAAACCTCCACAACTGATCTCAGTAGAAGAGTCTTCCTTTACG
A12	ctsz_B1_6-2	GAGGAGGGCAGCAAACGGAAAGATTCAGAAAATCACTCCTAACCT
B1	ctsz_B1_7-1	TGCAGGTTCATCTTAAGACAGCGTTTAGAAGAGTCTTCCTTTACG
B2	ctsz_B1_7-2	GAGGAGGGCAGCAAACGGAACTCTGTGAACGGCACATCACAGACG
B3	ctsz_B1_8-1	AAGGATTGGATCTCCGTACATGCAGTAGAAGAGTCTTCCTTTACG
B4	ctsz_B1_8-2	GAGGAGGGCAGCAAACGGAACTCTTCGATGGCGAGGTTGTATTGG
B5	ctsz_B1_9-1	ATGCGCTGGTGACTATTCTGAGCCATAGAAGAGTCTTCCTTTACG
B6	ctsz_B1_9-2	GAGGAGGGCAGCAAACGGAACTTTCTCACCCCAGGGCTCTCCCCA
B7	ctsz_B1_10-1	AACTCCACTCCATTCTCATCTACACTAGAAGAGTCTTCCTTTACG
B8	ctsz_B1_10-2	GAGGAGGGCAGCAAACGGAACATCCGGCTACAGAGACGATGTGGT
B9	ctsz_B1_11-1	GTACTCGGAGTACAAACCACCAGTGTAGAAGAGTCTTCCTTTACG
B10	ctsz_B1_11-2	GAGGAGGGCAGCAAACGGAAGGCATCAAGCTTATCTGTTGCCATG
B11	ctsz_B1_12-1	CTCCTGAATAAATCTCAGCTTTCATTAGAAGAGTCTTCCTTTACG
B12	ctsz_B1_12-2	GAGGAGGGCAGCAAACGGAATGTCCAGTCCACTGGCTGAACCATA
C1	ctsz_B1_13-1	GTGAAGTTCTTCACGATGTTACACATAGAAGAGTCTTCCTTTACG
C2	ctsz_B1_13-2	GAGGAGGGCAGCAAACGGAACCAAAGGTTGTGCAGGTGCCACACT
C3	ctsz_B1_14-1	CTGGTCCTTGGCCTGATAGTTGTTGTAGAAGAGTCTTCCTTTACG
C4	ctsz_B1_14-2	GAGGAGGGCAGCAAACGGAAGGTTTCATCAGGAATGCCTTTATTG
C5	ctsz_B1_15-1	CAGAATGATCTCCACCACTGCAGGATAGAAGAGTCTTCCTTTACG
C6	ctsz_B1_15-2	GAGGAGGGCAGCAAACGGAACTGCGTCTCCACAGTCAATCACGTT
C7	ctsz_B1_16-1	GACGGCCATGCTGCTTTACGCTTGATAGAAGAGTCTTCCTTTACG
C8	ctsz_B1_16-2	GAGGAGGGCAGCAAACGGAATTGATACGATCTGCTAATGCACTAG
C9	ctsz_B1_17-1	GGAGCCGCAGTACTGAGGTATATGTTAGAAGAGTCTTCCTTTACG
C10	ctsz_B1_17-2	GAGGAGGGCAGCAAACGGAAGTTGCGTGTAGTGCTGACGTAGTTG
C11	ctsz_B1_18-1	AGTCCCACTCTTTGGGCAGTTCTTTTAGAAGAGTCTTCCTTTACG
C12	ctsz_B1_18-2	GAGGAGGGCAGCAAACGGAAAATTCATAGACTCATAAGGACGTGG
D1	ctsz_B1_19-1	AGGTTTCTCCTCGGCTGGGGCTTGTTAGAAGAGTCTTCCTTTACG
D2	ctsz_B1_19-2	GAGGAGGGCAGCAAACGGAACAGGGCTCGTTCTCGTTAAAATACC
D3	ctsz_B1_20-1	CAGAGTAAACAGATAAAAGAACAGCTAGAAGAGTCTTCCTTTACG
D4	ctsz_B1_20-2	GAGGAGGGCAGCAAACGGAAGCGAGCCATGTTGAATCTCAGGCGG

## Sheet: cubn_B2_probes
Well Position	Name	Sequence
A1	cubn_B2_1-1	AAGTACTACATCAAACATCTTTATTAAATCATCCAGTAAACCGCC
A2	cubn_B2_1-2	CCTCGTAAATCCTCATCAAACAAATAAAAGACATTAAAATACATA
A3	cubn_B2_2-1	CATTACGAGTGGTAGTAAAGTCACTAAATCATCCAGTAAACCGCC
A4	cubn_B2_2-2	CCTCGTAAATCCTCATCAAATGAAGAATATGAAGAGCTCGTTGCT
A5	cubn_B2_3-1	AACGGCGGGTAGGCATTGGGATATAAAATCATCCAGTAAACCGCC
A6	cubn_B2_3-2	CCTCGTAAATCCTCATCAAAGGAGATGTGATGGTCTGAGATGTTG
A7	cubn_B2_4-1	AGCAAGAGTGCTTTCTCCATCATACAAATCATCCAGTAAACCGCC
A8	cubn_B2_4-2	CCTCGTAAATCCTCATCAAACGCCACATAGTCAAAGTTACACGTC
A9	cubn_B2_5-1	TATCGGAGGACTGGAAACGAGCTGTAAATCATCCAGTAAACCGCC
A10	cubn_B2_5-2	CCTCGTAAATCCTCATCAAATAACATTTCTGGGTGCAATGATCGC
A11	cubn_B2_6-1	CTGGGGTAGACATTGGGATATCCAGAAATCATCCAGTAAACCGCC
A12	cubn_B2_6-2	CCTCGTAAATCCTCATCAAACTAGAGATGACACCTCCATCTCCAC
B1	cubn_B2_7-1	GATCTCAACAAAGTCAAATGCGCAGAAATCATCCAGTAAACCGCC
B2	cubn_B2_7-2	CCTCGTAAATCCTCATCAAAACTTTGGTCCTCCAGCCTCAAGTCA
B3	cubn_B2_8-1	GGAATCGTAAATACATGGTGGTGCCAAATCATCCAGTAAACCGCC
B4	cubn_B2_8-2	CCTCGTAAATCCTCATCAAAAAGAATGCTGTGTAGATGGGCGGGT
B5	cubn_B2_9-1	AGGTTGGGCTTGTAGTTTTGTGGATAAATCATCCAGTAAACCGCC
B6	cubn_B2_9-2	CCTCGTAAATCCTCATCAAATGAGGAGAACTTAGAACGCCTCTGT
B7	cubn_B2_10-1	CGAGTTAGTGCTTGGACCATCGTATAAATCATCCAGTAAACCGCC
B8	cubn_B2_10-2	CCTCGTAAATCCTCATCAAACTTGAGCTTGTCATAAAGGCAATTG
B9	cubn_B2_11-1	TCCCTACTGCATGATCTGACACAAAAAATCATCCAGTAAACCGCC
B10	cubn_B2_11-2	CCTCGTAAATCCTCATCAAATAACCACCATGGCGTTGCTCAATGA
B11	cubn_B2_12-1	TTGTCTGGGTAGTTGCTGGGATACTAAATCATCCAGTAAACCGCC
B12	cubn_B2_12-2	CCTCGTAAATCCTCATCAAAGGAGAGTGGATCTCTCCGCTGGGGG
C1	cubn_B2_13-1	CAGCTTTACATGGTCGTAGCCACATAAATCATCCAGTAAACCGCC
C2	cubn_B2_13-2	CCTCGTAAATCCTCATCAAAATCGGATTGCTCCACCTCAAAGGCT
C3	cubn_B2_14-1	ATCTGAACTTCATCCACAGCCGATTAAATCATCCAGTAAACCGCC
C4	cubn_B2_14-2	CCTCGTAAATCCTCATCAAATATGGGACACTATTATAGGTGGAGC
C5	cubn_B2_15-1	TCAGTGGGGTGTCCTGGACTGGTAAAAATCATCCAGTAAACCGCC
C6	cubn_B2_15-2	CCTCGTAAATCCTCATCAAAGAGCCTGTTGGTTCTGTGAGAGTTT
C7	cubn_B2_16-1	GGTATGAATCTCCAGGTCCATGTGGAAATCATCCAGTAAACCGCC
C8	cubn_B2_16-2	CCTCGTAAATCCTCATCAAAGAAGTTGAGAGCCACCTGTTCACTG
C9	cubn_B2_17-1	GAGAATTGTGGGAGCTGAAGAGTTCAAATCATCCAGTAAACCGCC
C10	cubn_B2_17-2	CCTCGTAAATCCTCATCAAACTGGTGCGGCGCTGCCACAGTATTT
C11	cubn_B2_18-1	CTTCCTGGAGTTGAAGTGCAGGTAGAAATCATCCAGTAAACCGCC
C12	cubn_B2_18-2	CCTCGTAAATCCTCATCAAAAGTGGAAAACATCCTCCATTGTTGG
D1	cubn_B2_19-1	TGCCAACACCTGACACTCATTCACAAAATCATCCAGTAAACCGCC
D2	cubn_B2_19-2	CCTCGTAAATCCTCATCAAACACAGCACATGTAGGACCCTGCCAG
D3	cubn_B2_20-1	GGCTAAAAACTCAACCGGCCACAGGAAATCATCCAGTAAACCGCC
D4	cubn_B2_20-2	CCTCGTAAATCCTCATCAAACACTTTGGCCTGAAGACTCCACAAT

## Sheet: dab2_B1_probes
Well Position	Name	Sequence
A1	C:\labdata\insitu\dab2_B1_1-1	TAGATTTGTCTTTTTTAATGAATAATAGAAGAGTCTTCCTTTACG
A2	C:\labdata\insitu\dab2_B1_1-2	GAGGAGGGCAGCAAACGGAAAGGATTAAGCATTTTACTTAATTAT
A3	C:\labdata\insitu\dab2_B1_2-1	TTTCACATGTGACTTGGGGTTGATCTAGAAGAGTCTTCCTTTACG
A4	C:\labdata\insitu\dab2_B1_2-2	GAGGAGGGCAGCAAACGGAATGAGAAAGGCACAGAAATAGACTAC
A5	C:\labdata\insitu\dab2_B1_3-1	GCTCTGGGTCAGCAGGAGTGTACAGTAGAAGAGTCTTCCTTTACG
A6	C:\labdata\insitu\dab2_B1_3-2	GAGGAGGGCAGCAAACGGAAGTGGTAACTTTCAGGCAAAGGGATT
A7	C:\labdata\insitu\dab2_B1_4-1	ATCTGTGCCTGCTGCAGGAGCTGGGTAGAAGAGTCTTCCTTTACG
A8	C:\labdata\insitu\dab2_B1_4-2	GAGGAGGGCAGCAAACGGAATGTGGGTGCAGGGACTGGATTTGAG
A9	C:\labdata\insitu\dab2_B1_5-1	TTAGCTGAGATTTGGTTTATTTCAATAGAAGAGTCTTCCTTTACG
A10	C:\labdata\insitu\dab2_B1_5-2	GAGGAGGGCAGCAAACGGAATCATCATGATCTGCTGCATCTTGAG
A11	C:\labdata\insitu\dab2_B1_6-1	CAGATTTACTCTCCTTCTCCCCGAGTAGAAGAGTCTTCCTTTACG
A12	C:\labdata\insitu\dab2_B1_6-2	GAGGAGGGCAGCAAACGGAAGGTCCAAAGCTGTAAAGGCACTTTT
B1	C:\labdata\insitu\dab2_B1_7-1	TGGTTGGAAAGGACTAGCCACAGGATAGAAGAGTCTTCCTTTACG
B2	C:\labdata\insitu\dab2_B1_7-2	GAGGAGGGCAGCAAACGGAAAGGAGCAGGCCACGTCCCAACAGGT
B3	C:\labdata\insitu\dab2_B1_8-1	AAAGGTCTTGGAGGTCCTGGAATTGTAGAAGAGTCTTCCTTTACG
B4	C:\labdata\insitu\dab2_B1_8-2	GAGGAGGGCAGCAAACGGAAACCTGAACACCGGCCTGAGGGGGGA
B5	C:\labdata\insitu\dab2_B1_9-1	GAATGGAGGCGTTCTGATTTGATGCTAGAAGAGTCTTCCTTTACG
B6	C:\labdata\insitu\dab2_B1_9-2	GAGGAGGGCAGCAAACGGAAGAGACTCATTTTGGGCAGGTGGAGC
B7	C:\labdata\insitu\dab2_B1_10-1	AGTAGTTGAGGGGTTGGTTTGGAACTAGAAGAGTCTTCCTTTACG
B8	C:\labdata\insitu\dab2_B1_10-2	GAGGAGGGCAGCAAACGGAATGCCAATTGCTTATTGGATCCATTA
B9	C:\labdata\insitu\dab2_B1_11-1	CCATTCAGATCACTTATCGGTAGCTTAGAAGAGTCTTCCTTTACG
B10	C:\labdata\insitu\dab2_B1_11-2	GAGGAGGGCAGCAAACGGAATGTACTTGATTATTTGGACTCTCGT
B11	C:\labdata\insitu\dab2_B1_12-1	AAAACACAGAATCTGATTGATCATTTAGAAGAGTCTTCCTTTACG
B12	C:\labdata\insitu\dab2_B1_12-2	GAGGAGGGCAGCAAACGGAAAGGGAGAAAAGGGATCGTCGCTGAA
C1	C:\labdata\insitu\dab2_B1_13-1	ATTGCCATCAAACAAATCGGATAACTAGAAGAGTCTTCCTTTACG
C2	C:\labdata\insitu\dab2_B1_13-2	GAGGAGGGCAGCAAACGGAAAAGCAGCAGAACACTGTCAGGCGTA
C3	C:\labdata\insitu\dab2_B1_14-1	GTGCCATTTCCTTCACCCTTTTGTCTAGAAGAGTCTTCCTTTACG
C4	C:\labdata\insitu\dab2_B1_14-2	GAGGAGGGCAGCAAACGGAAGCCTCCTGCTCTTTCTTCTTCATAT
C5	C:\labdata\insitu\dab2_B1_15-1	CCCGGTTATCAGTGACATCACGAGCTAGAAGAGTCTTCCTTTACG
C6	C:\labdata\insitu\dab2_B1_15-2	GAGGAGGGCAGCAAACGGAATGAAGGAGATCTTATTCACCACATG
C7	C:\labdata\insitu\dab2_B1_16-1	CTTCAGTTTCATCATGGAATCCTGATAGAAGAGTCTTCCTTTACG
C8	C:\labdata\insitu\dab2_B1_16-2	GAGGAGGGCAGCAAACGGAACATTTTATCCCCTCTTGCATCTTGA
C9	C:\labdata\insitu\dab2_B1_17-1	GTTCTGGTCACGGGTGCAGTGGTTATAGAAGAGTCTTCCTTTACG
C10	C:\labdata\insitu\dab2_B1_17-2	GAGGAGGGCAGCAAACGGAAGTGACAGATGCTGATTCAGTGGTCG
C11	C:\labdata\insitu\dab2_B1_18-1	AGCCCAGAGGCAAAAATGAAGGGGGTAGAAGAGTCTTCCTTTACG
C12	C:\labdata\insitu\dab2_B1_18-2	GAGGAGGGCAGCAAACGGAAAAACACAGGTGGGATATTCAGCAAG
D1	C:\labdata\insitu\dab2_B1_19-1	AATTAAAACTTGTTAATCCTTTTCCTAGAAGAGTCTTCCTTTACG
D2	C:\labdata\insitu\dab2_B1_19-2	GAGGAGGGCAGCAAACGGAACAGCTCATCTGCCCGCAATCGTGCA
D3	C:\labdata\insitu\dab2_B1_20-1	GCTCCTCGGCCTCCTCAAACCAAACTAGAAGAGTCTTCCTTTACG
D4	C:\labdata\insitu\dab2_B1_20-2	GAGGAGGGCAGCAAACGGAAACTGACAGAGACTCGAGCGCCTCCC
